# Supplementary material
Source: publisher figshare collection journal article supplement (https://acs.figshare.com/ndownloader/files/4710136)
Supplement: Supplementary file 1 [file 4710136]

data_bch2re2s 
  
_audit_creation_method            SHELXL-97 
_chemical_name_systematic 
; 
 ? 
; 
_chemical_name_common             ? 
_chemical_melting_point           ? 
_chemical_formula_moiety          ? 
_chemical_formula_sum 
 'C32 H58 O8 P2 Pt2 Re2' 
_chemical_formula_weight          1395.30 
  
loop_ 
 _atom_type_symbol 
 _atom_type_description 
 _atom_type_scat_dispersion_real 
 _atom_type_scat_dispersion_imag 
 _atom_type_scat_source 
 'C'  'C'   0.0033   0.0016 
 'International Tables Vol C Tables 4.2.6.8 and 6.1.1.4' 
 'H'  'H'   0.0000   0.0000 
 'International Tables Vol C Tables 4.2.6.8 and 6.1.1.4' 
 'O'  'O'   0.0106   0.0060 
 'International Tables Vol C Tables 4.2.6.8 and 6.1.1.4' 
 'P'  'P'   0.1023   0.0942 
 'International Tables Vol C Tables 4.2.6.8 and 6.1.1.4' 
 'Re'  'Re'  -1.0185   7.2310 
 'International Tables Vol C Tables 4.2.6.8 and 6.1.1.4' 
 'Pt'  'Pt'  -1.7033   8.3905 
 'International Tables Vol C Tables 4.2.6.8 and 6.1.1.4' 
  
_symmetry_cell_setting            Triclinic 
_symmetry_space_group_name_H-M    P-1 
  
loop_ 
 _symmetry_equiv_pos_as_xyz 
 'x, y, z' 
 '-x, -y, -z' 
  
_cell_length_a                    9.0728(4) 
_cell_length_b                    10.2568(5) 
_cell_length_c                    11.5861(6) 
_cell_angle_alpha                 95.2040(10) 
_cell_angle_beta                  97.8890(10) 
_cell_angle_gamma                 101.2590(10) 
_cell_volume                      1039.73(9) 
_cell_formula_units_Z             1 
_cell_measurement_temperature     294(2) 
_cell_measurement_reflns_used     6718 
_cell_measurement_theta_min       2.32 
_cell_measurement_theta_max       28.30 
  
_exptl_crystal_description        Cube 
_exptl_crystal_colour             Red 
_exptl_crystal_size_max           0.20 
_exptl_crystal_size_mid           0.14 
_exptl_crystal_size_min           0.12 
_exptl_crystal_density_meas       ? 
_exptl_crystal_density_diffrn     2.228 
_exptl_crystal_density_method     'not measured' 
_exptl_crystal_F_000              650 
_exptl_absorpt_coefficient_mu     12.627 
_exptl_absorpt_correction_type    Multi-scan 
_exptl_absorpt_correction_T_min   0.621 
_exptl_absorpt_correction_T_max   1.000 
_exptl_absorpt_process_details    '(SADABS, Bruker, 1997)' 
  
_exptl_special_details 
; 
 ? 
; 
  
_diffrn_ambient_temperature       294(2) 
_diffrn_radiation_wavelength      0.71073 
_diffrn_radiation_type            MoK\a 
_diffrn_radiation_source          'fine-focus sealed tube' 
_diffrn_radiation_monochromator   graphite 
_diffrn_measurement_device_type   'Bruker SMART APEX CCD diffractometer' 
_diffrn_measurement_method        'omega scans' 
_diffrn_detector_area_resol_mean  ? 
_diffrn_standards_number          ? 
_diffrn_standards_interval_count  ? 
_diffrn_standards_interval_time   ? 
_diffrn_standards_decay_%         <1 
_diffrn_reflns_number             10982 
_diffrn_reflns_av_R_equivalents   0.0152 
_diffrn_reflns_av_sigmaI/netI     0.0226 
_diffrn_reflns_limit_h_min        -12 
_diffrn_reflns_limit_h_max        12 
_diffrn_reflns_limit_k_min        -13 
_diffrn_reflns_limit_k_max        13 
_diffrn_reflns_limit_l_min        -15 
_diffrn_reflns_limit_l_max        15 
_diffrn_reflns_theta_min          1.79 
_diffrn_reflns_theta_max          28.30 
_reflns_number_total              5139 
_reflns_number_gt                 4668 
_reflns_threshold_expression      >2sigma(I) 
  
_computing_data_collection        'SMART V5.625 (Bruker, 2001)' 
_computing_cell_refinement        'SAINT+  V6.2 (Bruker, 2001)' 
_computing_data_reduction         'SAINT+  V6.2' 
_computing_structure_solution     'SHELXS-97 (Sheldrick, 1990)' 
_computing_structure_refinement   'SHELXL-97 (Sheldrick, 1997)' 
_computing_molecular_graphics     'SHELXTL V6.1 (Sheldrick, 1997)' 
_computing_publication_material   'SHELXTL V6.1' 
  
_refine_special_details 
; 
 Refinement of F^2^ against ALL reflections.  The weighted R-factor wR and 
 goodness of fit S are based on F^2^, conventional R-factors R are based 
 on F, with F set to zero for negative F^2^. The threshold expression of 
 F^2^ > 2sigma(F^2^) is used only for calculating R-factors(gt) etc. and is 
 not relevant to the choice of reflections for refinement.  R-factors based 
 on F^2^ are statistically about twice as large as those based on F, and R- 
 factors based on ALL data will be even larger. 
; 
  
_refine_ls_structure_factor_coef  Fsqd 
_refine_ls_matrix_type            full 
_refine_ls_weighting_scheme       calc 
_refine_ls_weighting_details 
 'calc w=1/[\s^2^(Fo^2^)+(0.0273P)^2^+0.0000P] where P=(Fo^2^+2Fc^2^)/3' 
_atom_sites_solution_primary      direct 
_atom_sites_solution_secondary    difmap 
_atom_sites_solution_hydrogens    geom 
_refine_ls_hydrogen_treatment     mixed 
_refine_ls_extinction_method      none 
_refine_ls_extinction_coef        ? 
_refine_ls_number_reflns          5139 
_refine_ls_number_parameters      225 
_refine_ls_number_restraints      0 
_refine_ls_R_factor_all           0.0227 
_refine_ls_R_factor_gt            0.0200 
_refine_ls_wR_factor_ref          0.0507 
_refine_ls_wR_factor_gt           0.0497 
_refine_ls_goodness_of_fit_ref    1.078 
_refine_ls_restrained_S_all       1.078 
_refine_ls_shift/su_max           0.001 
_refine_ls_shift/su_mean          0.000 
  
loop_ 
 _atom_site_label 
 _atom_site_type_symbol 
 _atom_site_fract_x 
 _atom_site_fract_y 
 _atom_site_fract_z 
 _atom_site_U_iso_or_equiv 
 _atom_site_adp_type 
 _atom_site_occupancy 
 _atom_site_symmetry_multiplicity 
 _atom_site_calc_flag 
 _atom_site_refinement_flags 
 _atom_site_disorder_assembly 
 _atom_site_disorder_group 
Pt1 Pt 0.097326(13) 0.082762(11) 0.087919(10) 0.02819(4) Uani 1 1 d . . . 
Re1 Re 0.032798(15) 0.184353(12) -0.133068(11) 0.03223(5) Uani 1 1 d . . . 
P1 P 0.25666(10) 0.22858(9) 0.24604(7) 0.03187(18) Uani 1 1 d . . . 
O11 O -0.2403(4) 0.2070(3) 0.0029(3) 0.0701(9) Uani 1 1 d . . . 
O12 O 0.1614(4) 0.4874(3) -0.1134(3) 0.0710(10) Uani 1 1 d . . . 
O13 O -0.1313(4) 0.2501(3) -0.3633(3) 0.0617(8) Uani 1 1 d . . . 
O14 O 0.3044(5) 0.1373(5) -0.2548(4) 0.1009(14) Uani 1 1 d . . . 
H1 H 0.172(5) 0.178(4) 0.001(4) 0.065(13) Uiso 1 1 d . . . 
H2 H 0.036(4) -0.003(4) 0.196(3) 0.043(10) Uiso 1 1 d . . . 
C11 C -0.1405(5) 0.1956(4) -0.0432(3) 0.0483(9) Uani 1 1 d . . . 
C12 C 0.1136(4) 0.3757(4) -0.1151(3) 0.0443(9) Uani 1 1 d . . . 
C13 C -0.0743(5) 0.2209(4) -0.2781(3) 0.0422(8) Uani 1 1 d . . . 
C14 C 0.2044(5) 0.1532(4) -0.2098(4) 0.0543(10) Uani 1 1 d . . . 
C21 C 0.4293(4) 0.1604(4) 0.3062(4) 0.0515(10) Uani 1 1 d . . . 
C22 C 0.5428(6) 0.1718(6) 0.2202(5) 0.0797(16) Uani 1 1 d . . . 
H22A H 0.6172 0.1195 0.2413 0.120 Uiso 1 1 calc R . . 
H22B H 0.5927 0.2638 0.2229 0.120 Uiso 1 1 calc R . . 
H22C H 0.4900 0.1391 0.1423 0.120 Uiso 1 1 calc R . . 
C23 C 0.3814(5) 0.0098(5) 0.3156(4) 0.0625(12) Uani 1 1 d . . . 
H23A H 0.3253 -0.0354 0.2418 0.094 Uiso 1 1 calc R . . 
H23B H 0.3186 -0.0031 0.3756 0.094 Uiso 1 1 calc R . . 
H23C H 0.4705 -0.0262 0.3352 0.094 Uiso 1 1 calc R . . 
C24 C 0.5137(6) 0.2278(6) 0.4298(5) 0.0847(17) Uani 1 1 d . . . 
H24A H 0.4454 0.2146 0.4861 0.127 Uiso 1 1 calc R . . 
H24B H 0.5483 0.3220 0.4273 0.127 Uiso 1 1 calc R . . 
H24C H 0.5995 0.1885 0.4522 0.127 Uiso 1 1 calc R . . 
C25 C 0.1371(4) 0.2511(4) 0.3692(3) 0.0424(8) Uani 1 1 d . . . 
C26 C 0.1124(6) 0.1261(5) 0.4319(4) 0.0614(12) Uani 1 1 d . . . 
H26A H 0.2075 0.1178 0.4754 0.092 Uiso 1 1 calc R . . 
H26B H 0.0734 0.0486 0.3751 0.092 Uiso 1 1 calc R . . 
H26C H 0.0408 0.1332 0.4847 0.092 Uiso 1 1 calc R . . 
C27 C 0.2003(6) 0.3721(5) 0.4626(4) 0.0718(14) Uani 1 1 d . . . 
H27A H 0.1347 0.3718 0.5209 0.108 Uiso 1 1 calc R . . 
H27B H 0.2054 0.4531 0.4263 0.108 Uiso 1 1 calc R . . 
H27C H 0.3004 0.3673 0.4990 0.108 Uiso 1 1 calc R . . 
C28 C -0.0225(5) 0.2620(5) 0.3108(4) 0.0603(11) Uani 1 1 d . . . 
H28A H -0.0673 0.1828 0.2572 0.090 Uiso 1 1 calc R . . 
H28B H -0.0141 0.3390 0.2689 0.090 Uiso 1 1 calc R . . 
H28C H -0.0853 0.2710 0.3701 0.090 Uiso 1 1 calc R . . 
C29 C 0.3338(5) 0.4035(4) 0.2067(3) 0.0498(10) Uani 1 1 d . . . 
C30 C 0.4537(6) 0.4984(5) 0.3025(5) 0.0847(18) Uani 1 1 d . . . 
H30A H 0.4740 0.5868 0.2790 0.127 Uiso 1 1 calc R . . 
H30B H 0.5461 0.4655 0.3121 0.127 Uiso 1 1 calc R . . 
H30C H 0.4149 0.5017 0.3756 0.127 Uiso 1 1 calc R . . 
C31 C 0.1983(6) 0.4692(4) 0.1772(4) 0.0621(12) Uani 1 1 d . . . 
H31A H 0.2291 0.5467 0.1386 0.093 Uiso 1 1 calc R . . 
H31B H 0.1626 0.4956 0.2482 0.093 Uiso 1 1 calc R . . 
H31C H 0.1181 0.4066 0.1262 0.093 Uiso 1 1 calc R . . 
C32 C 0.4121(5) 0.3963(5) 0.0969(4) 0.0638(13) Uani 1 1 d . . . 
H32A H 0.3527 0.3257 0.0394 0.096 Uiso 1 1 calc R . . 
H32B H 0.5118 0.3788 0.1183 0.096 Uiso 1 1 calc R . . 
H32C H 0.4206 0.4800 0.0648 0.096 Uiso 1 1 calc R . . 
  
loop_ 
 _atom_site_aniso_label 
 _atom_site_aniso_U_11 
 _atom_site_aniso_U_22 
 _atom_site_aniso_U_33 
 _atom_site_aniso_U_23 
 _atom_site_aniso_U_13 
 _atom_site_aniso_U_12 
Pt1 0.03136(7) 0.02732(7) 0.02353(7) 0.00182(5) 0.00147(5) 0.00310(5) 
Re1 0.03931(8) 0.02862(7) 0.02732(7) 0.00560(5) 0.00315(5) 0.00417(6) 
P1 0.0309(4) 0.0340(4) 0.0259(4) 0.0019(3) 0.0001(3) -0.0007(3) 
O11 0.065(2) 0.080(2) 0.074(2) 0.0053(18) 0.0358(18) 0.0216(18) 
O12 0.075(2) 0.0365(16) 0.088(3) 0.0170(16) -0.0139(19) -0.0052(15) 
O13 0.079(2) 0.0645(19) 0.0402(16) 0.0155(14) -0.0052(15) 0.0185(16) 
O14 0.089(3) 0.125(4) 0.114(3) 0.026(3) 0.052(3) 0.054(3) 
C11 0.058(2) 0.044(2) 0.040(2) -0.0002(17) 0.0083(18) 0.0061(18) 
C12 0.049(2) 0.0349(19) 0.045(2) 0.0074(16) -0.0029(17) 0.0040(16) 
C13 0.054(2) 0.0364(18) 0.0349(19) 0.0070(15) 0.0068(16) 0.0055(16) 
C14 0.057(3) 0.058(3) 0.055(2) 0.014(2) 0.015(2) 0.023(2) 
C21 0.035(2) 0.061(3) 0.053(2) 0.006(2) -0.0068(17) 0.0070(18) 
C22 0.054(3) 0.099(4) 0.097(4) 0.025(3) 0.024(3) 0.028(3) 
C23 0.049(2) 0.068(3) 0.072(3) 0.018(2) -0.006(2) 0.022(2) 
C24 0.070(3) 0.089(4) 0.076(4) -0.002(3) -0.039(3) 0.012(3) 
C25 0.045(2) 0.0432(19) 0.0331(18) -0.0067(15) 0.0096(15) -0.0020(16) 
C26 0.080(3) 0.064(3) 0.039(2) 0.005(2) 0.023(2) 0.003(2) 
C27 0.083(3) 0.068(3) 0.051(3) -0.023(2) 0.014(2) -0.006(3) 
C28 0.048(2) 0.068(3) 0.064(3) -0.005(2) 0.018(2) 0.013(2) 
C29 0.056(2) 0.039(2) 0.041(2) 0.0041(16) -0.0020(18) -0.0145(17) 
C30 0.096(4) 0.065(3) 0.061(3) 0.005(3) -0.016(3) -0.041(3) 
C31 0.083(3) 0.040(2) 0.065(3) 0.010(2) 0.016(3) 0.011(2) 
C32 0.045(2) 0.080(3) 0.057(3) 0.024(2) 0.004(2) -0.015(2) 
  
_geom_special_details 
; 
 All esds (except the esd in the dihedral angle between two l.s. planes) 
 are estimated using the full covariance matrix.  The cell esds are taken 
 into account individually in the estimation of esds in distances, angles 
 and torsion angles; correlations between esds in cell parameters are only 
 used when they are defined by crystal symmetry.  An approximate (isotropic) 
 treatment of cell esds is used for estimating esds involving l.s. planes. 
; 
  
loop_ 
 _geom_bond_atom_site_label_1 
 _geom_bond_atom_site_label_2 
 _geom_bond_distance 
 _geom_bond_site_symmetry_2 
 _geom_bond_publ_flag 
Pt1 P1 2.3695(8) . ? 
Pt1 Pt1 2.7140(2) 2 ? 
Pt1 Re1 2.8801(2) . ? 
Pt1 Re1 2.8879(2) 2 ? 
Pt1 H1 1.59(4) . ? 
Pt1 H2 1.69(4) . ? 
Re1 C13 1.928(4) . ? 
Re1 C12 1.938(4) . ? 
Re1 C14 1.960(4) . ? 
Re1 C11 2.017(4) . ? 
Re1 Pt1 2.8879(2) 2 ? 
Re1 H1 1.88(4) . ? 
P1 C21 1.909(4) . ? 
P1 C29 1.914(4) . ? 
P1 C25 1.931(4) . ? 
O11 C11 1.132(5) . ? 
O12 C12 1.140(4) . ? 
O13 C13 1.142(4) . ? 
O14 C14 1.137(5) . ? 
C21 C22 1.524(6) . ? 
C21 C23 1.539(6) . ? 
C21 C24 1.558(6) . ? 
C22 H22A 0.9600 . ? 
C22 H22B 0.9600 . ? 
C22 H22C 0.9600 . ? 
C23 H23A 0.9600 . ? 
C23 H23B 0.9600 . ? 
C23 H23C 0.9600 . ? 
C24 H24A 0.9600 . ? 
C24 H24B 0.9600 . ? 
C24 H24C 0.9600 . ? 
C25 C26 1.524(6) . ? 
C25 C27 1.533(5) . ? 
C25 C28 1.541(6) . ? 
C26 H26A 0.9600 . ? 
C26 H26B 0.9600 . ? 
C26 H26C 0.9600 . ? 
C27 H27A 0.9600 . ? 
C27 H27B 0.9600 . ? 
C27 H27C 0.9600 . ? 
C28 H28A 0.9600 . ? 
C28 H28B 0.9600 . ? 
C28 H28C 0.9600 . ? 
C29 C31 1.527(6) . ? 
C29 C32 1.543(6) . ? 
C29 C30 1.556(5) . ? 
C30 H30A 0.9600 . ? 
C30 H30B 0.9600 . ? 
C30 H30C 0.9600 . ? 
C31 H31A 0.9600 . ? 
C31 H31B 0.9600 . ? 
C31 H31C 0.9600 . ? 
C32 H32A 0.9600 . ? 
C32 H32B 0.9600 . ? 
C32 H32C 0.9600 . ? 
  
loop_ 
 _geom_angle_atom_site_label_1 
 _geom_angle_atom_site_label_2 
 _geom_angle_atom_site_label_3 
 _geom_angle 
 _geom_angle_site_symmetry_1 
 _geom_angle_site_symmetry_3 
 _geom_angle_publ_flag 
P1 Pt1 Pt1 177.13(2) . 2 ? 
P1 Pt1 Re1 118.65(2) . . ? 
Pt1 Pt1 Re1 62.078(6) 2 . ? 
P1 Pt1 Re1 117.41(2) . 2 ? 
Pt1 Pt1 Re1 61.785(6) 2 2 ? 
Re1 Pt1 Re1 123.863(5) . 2 ? 
P1 Pt1 H1 88.0(16) . . ? 
Pt1 Pt1 H1 93.7(16) 2 . ? 
Re1 Pt1 H1 37.2(16) . . ? 
Re1 Pt1 H1 148.7(16) 2 . ? 
P1 Pt1 H2 83.6(12) . . ? 
Pt1 Pt1 H2 94.7(12) 2 . ? 
Re1 Pt1 H2 149.7(12) . . ? 
Re1 Pt1 H2 38.4(12) 2 . ? 
H1 Pt1 H2 172(2) . . ? 
C13 Re1 C12 82.60(15) . . ? 
C13 Re1 C14 91.38(17) . . ? 
C12 Re1 C14 90.21(18) . . ? 
C13 Re1 C11 94.18(17) . . ? 
C12 Re1 C11 95.43(17) . . ? 
C14 Re1 C11 172.55(17) . . ? 
C13 Re1 Pt1 161.72(11) . . ? 
C12 Re1 Pt1 109.55(11) . . ? 
C14 Re1 Pt1 101.91(13) . . ? 
C11 Re1 Pt1 71.62(12) . . ? 
C13 Re1 Pt1 109.20(11) . 2 ? 
C12 Re1 Pt1 162.91(12) . 2 ? 
C14 Re1 Pt1 101.51(13) . 2 ? 
C11 Re1 Pt1 71.95(11) . 2 ? 
Pt1 Re1 Pt1 56.137(5) . 2 ? 
C13 Re1 H1 167.3(13) . . ? 
C12 Re1 H1 87.1(13) . . ? 
C14 Re1 H1 81.3(13) . . ? 
C11 Re1 H1 94.1(13) . . ? 
Pt1 Re1 H1 30.8(13) . . ? 
Pt1 Re1 H1 82.5(13) 2 . ? 
C21 P1 C29 106.55(19) . . ? 
C21 P1 C25 109.17(19) . . ? 
C29 P1 C25 106.90(18) . . ? 
C21 P1 Pt1 112.42(13) . . ? 
C29 P1 Pt1 113.78(12) . . ? 
C25 P1 Pt1 107.83(11) . . ? 
O11 C11 Re1 176.0(4) . . ? 
O12 C12 Re1 174.8(4) . . ? 
O13 C13 Re1 175.7(3) . . ? 
O14 C14 Re1 178.8(4) . . ? 
C22 C21 C23 105.6(4) . . ? 
C22 C21 C24 108.8(4) . . ? 
C23 C21 C24 106.7(4) . . ? 
C22 C21 P1 109.8(3) . . ? 
C23 C21 P1 110.1(3) . . ? 
C24 C21 P1 115.3(3) . . ? 
C21 C22 H22A 109.5 . . ? 
C21 C22 H22B 109.5 . . ? 
H22A C22 H22B 109.5 . . ? 
C21 C22 H22C 109.5 . . ? 
H22A C22 H22C 109.5 . . ? 
H22B C22 H22C 109.5 . . ? 
C21 C23 H23A 109.5 . . ? 
C21 C23 H23B 109.5 . . ? 
H23A C23 H23B 109.5 . . ? 
C21 C23 H23C 109.5 . . ? 
H23A C23 H23C 109.5 . . ? 
H23B C23 H23C 109.5 . . ? 
C21 C24 H24A 109.5 . . ? 
C21 C24 H24B 109.5 . . ? 
H24A C24 H24B 109.5 . . ? 
C21 C24 H24C 109.5 . . ? 
H24A C24 H24C 109.5 . . ? 
H24B C24 H24C 109.5 . . ? 
C26 C25 C27 107.8(3) . . ? 
C26 C25 C28 105.6(3) . . ? 
C27 C25 C28 108.5(4) . . ? 
C26 C25 P1 110.4(3) . . ? 
C27 C25 P1 116.3(3) . . ? 
C28 C25 P1 107.7(3) . . ? 
C25 C26 H26A 109.5 . . ? 
C25 C26 H26B 109.5 . . ? 
H26A C26 H26B 109.5 . . ? 
C25 C26 H26C 109.5 . . ? 
H26A C26 H26C 109.5 . . ? 
H26B C26 H26C 109.5 . . ? 
C25 C27 H27A 109.5 . . ? 
C25 C27 H27B 109.5 . . ? 
H27A C27 H27B 109.5 . . ? 
C25 C27 H27C 109.5 . . ? 
H27A C27 H27C 109.5 . . ? 
H27B C27 H27C 109.5 . . ? 
C25 C28 H28A 109.5 . . ? 
C25 C28 H28B 109.5 . . ? 
H28A C28 H28B 109.5 . . ? 
C25 C28 H28C 109.5 . . ? 
H28A C28 H28C 109.5 . . ? 
H28B C28 H28C 109.5 . . ? 
C31 C29 C32 107.4(4) . . ? 
C31 C29 C30 108.9(4) . . ? 
C32 C29 C30 105.2(4) . . ? 
C31 C29 P1 107.6(3) . . ? 
C32 C29 P1 111.4(3) . . ? 
C30 C29 P1 116.1(3) . . ? 
C29 C30 H30A 109.5 . . ? 
C29 C30 H30B 109.5 . . ? 
H30A C30 H30B 109.5 . . ? 
C29 C30 H30C 109.5 . . ? 
H30A C30 H30C 109.5 . . ? 
H30B C30 H30C 109.5 . . ? 
C29 C31 H31A 109.5 . . ? 
C29 C31 H31B 109.5 . . ? 
H31A C31 H31B 109.5 . . ? 
C29 C31 H31C 109.5 . . ? 
H31A C31 H31C 109.5 . . ? 
H31B C31 H31C 109.5 . . ? 
C29 C32 H32A 109.5 . . ? 
C29 C32 H32B 109.5 . . ? 
H32A C32 H32B 109.5 . . ? 
C29 C32 H32C 109.5 . . ? 
H32A C32 H32C 109.5 . . ? 
H32B C32 H32C 109.5 . . ? 
  
_diffrn_measured_fraction_theta_max    0.991 
_diffrn_reflns_theta_full              28.30 
_diffrn_measured_fraction_theta_full   0.991 
_refine_diff_density_max    0.614 
_refine_diff_density_min   -1.631 
_refine_diff_density_rms    0.173 
